# Supplementary material
Source: publisher site journal article supplement (https://www.spandidos-publications.com/5380/downloadSupplementary)
Supplement: Supplementary file 1 [file downloadSupplementary]

**TABLE S1.** Description of 16 cases (15 previous cases and our case) of MTC in PLWHA.

| Literature                     | Age (years) | Sex    | Symptoms       | CD4 count (/μl) | HIV infection (years) | Surgical resection | Post-operative course | Post-diagnostic course  |
|--------------------------------|-------------|--------|----------------|-----------------|-----------------------|--------------------|-----------------------|-------------------------|
| Leonidas <i>et al</i> (4)      | 11          | Male   | LIP, LA, PE    | 277             | 11                    | Cyst resection     | No recurrence         | Cured                   |
|                                | 5           | Male   | LIP, PE        | 290             | 5                     | No                 | N/A                   | Not described           |
|                                | 44          | Male   | PE             | 40              | 9                     | Wedge resection    | No recurrence         | Cured                   |
| Kontny <i>et al</i> (15)       | 2           | Male   | HM, LIP        | 326             | 2                     | No                 | N/A                   | Decrease in tumor size  |
|                                | 6           | Female | LA, HSM, PE    | 170             | 6                     | No                 | N/A                   | No change in tumor size |
|                                | 3           | Male   | None           | 102             | 3                     | No                 | N/A                   | Increase in tumor size  |
|                                | 10          | Female | HM             | 153             | 10                    | No                 | N/A                   | Decrease in tumor size  |
|                                | 2           | Male   | HM, LIP, LA    | 733             | 2                     | No                 | N/A                   | Resolution              |
|                                | 3           | Male   | HM, LIP, LA    | 373             | 3                     | No                 | N/A                   | Resolution              |
|                                | 12          | Female | LIP, LA, SM    | 254             | 12                    | No                 | N/A                   | Decrease in tumor size  |
| Shi <i>et al</i> (16)          | 47          | Female | Cough, CP, PE  | 551             | 19                    | Thymectomy         | No recurrence         | Cured                   |
| Tamagno <i>et al</i> (17)      | 15          | Female | Dyspnea, CP    | Not described   | 15                    | Thymectomy         | No recurrence         | Cured                   |
| Mishalani <i>et al</i> (18)    | 9           | Male   | Fever, LA      | 428             | 2                     | Thoracotomy        | No recurrence         | Cured                   |
| Chhieng <i>et al</i> (19)      | 35          | Male   | CP             | 378             | Not described         | No                 | N/A                   | Not described           |
| Shalaby-Rana <i>et al</i> (20) | 10          | Male   | Fever, LIP, CP | Not described   | 10                    | Surgical resection | No recurrence         | Cured                   |

HM, hepatomegaly; LIP, lymphoid interstitial pneumonia; LA, lymphadenopathy; HSM, hepatosplenomegaly; PE, parotic enlargement; SM, Splenomegaly; CP, Chest pain; N/A, not applicable.
